# Supplementary material for: Effect of Chia (Salvia hispanica L.) Associated with High-Fat Diet on the Intestinal Health of Wistar Rats
Source: MDPI journal article supplement (doi:10.3390/nu14224924), 2022-11-21
Supplement: s1 [file s1]

**Table S1.** Sequencing data at the end of 35 days of treatment, according to each experimental group.

| Groups   | Good's coverage | Raw sequences | After filtering and cleaning |          | After normalization |          |
|----------|-----------------|---------------|------------------------------|----------|---------------------|----------|
|          |                 |               | Reads                        | OTUs     | Reads               | OTUs     |
| SD       | 0.998 ± 0.000   | 29399 ± 3650  | 22232 ± 2825                 | 316 ± 24 | 15324 ± 7           | 316 ± 24 |
| SD+chia  | 0.997 ± 0.001   | 35042 ± 5041  | 27337 ± 3937                 | 404 ± 51 | 15335 ± 39          | 394 ± 67 |
| HFD      | 0.997 ± 0.000   | 25994 ± 5565  | 20763 ± 3619                 | 300 ± 78 | 15318 ± 8           | 300 ± 78 |
| HFD+chia | 0.997 ± 0.000   | 31449 ± 7733  | 24569 ± 5404                 | 396 ± 78 | 15313 ± 32          | 383 ± 69 |

Values referring to means ± SD, n = 8/group. SD: standard diet; SD+chia: standard diet + chia; HFD: high fat diet; HFD+chia: high fat diet + chia.

**Table S2.** Significantly different families and genus identified prior to FDR correction, at the end of 35 days of treatments.

|                  | SD                        | SD+chia                   | HFD                       | HFD+chia                   |
|------------------|---------------------------|---------------------------|---------------------------|----------------------------|
| Lachnospiraceae  | 27.34 ± 3.49 <sup>a</sup> | 26.61 ± 1.50 <sup>a</sup> | 22.78 ± 1.89 <sup>b</sup> | 26.97 ± 1.92 <sup>a</sup>  |
| Muribaculaceae   | 9.68 ± 1.39 <sup>b</sup>  | 12.88 ± 2.96 <sup>a</sup> | 12.63 ± 1.73 <sup>a</sup> | 11.98 ± 1.76 <sup>ab</sup> |
| <i>Roseburia</i> | 0.42 ± 0.14 <sup>b</sup>  | 0.68 ± 0.21 <sup>a</sup>  | 0.48 ± 0.14 <sup>ab</sup> | 0.71 ± 0.24 <sup>a</sup>   |

Values refer to mean relative abundance ± SD, n = 6/group. SD: standard diet; SD+chia: standard diet + chia; HFD: high fat diet; HFD+chia: high fat diet + chia. <sup>a,b</sup> Treatment groups not indicated by the same letter are significantly different (p<0.05).
